# Supplementary material for: Differences in chemoselectivity in olefin oxidation by a series of non-porphyrin manganese(iv)-oxo complexes
Source: Royal Society of Chemistry journal article supplement (doi:10.1039/d2dt00876a), 2022-01-01
Supplement: d2dt00876a1.pdf [file d2dt00876a1.pdf]

## Supporting Information for

# Differences in Chemoselectivity in Olefin Oxidation by a series of **Mn<sup>IV</sup> – oxo Complexes**

Priya Singh,<sup>a</sup> Melissa C. Denler,<sup>a</sup> Jaycee R. Mayfield,<sup>a</sup> and Timothy A. Jackson\*<sup>a</sup>

<sup>a</sup>*The University of Kansas, Department of Chemistry and Center for Environmentally Beneficial Catalysis, 1567 Irving Hill Road, Lawrence, KS 66045, USA.*

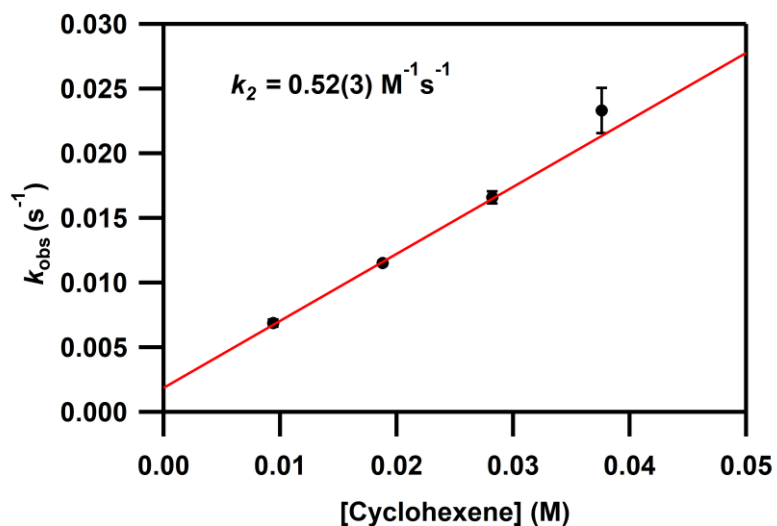

**Figure S1.** Plot of the pseudo-first-order rate constant ( $k_{\text{obs}}$ ) against substrate concentration for the reaction between  $[\text{Mn}^{\text{IV}}(\text{O})(2\text{pyN}2\text{Q})]^{2+}$  (**2**) and cyclohexene in TFE for substrate dissolved in  $\text{CH}_2\text{Cl}_2$ .

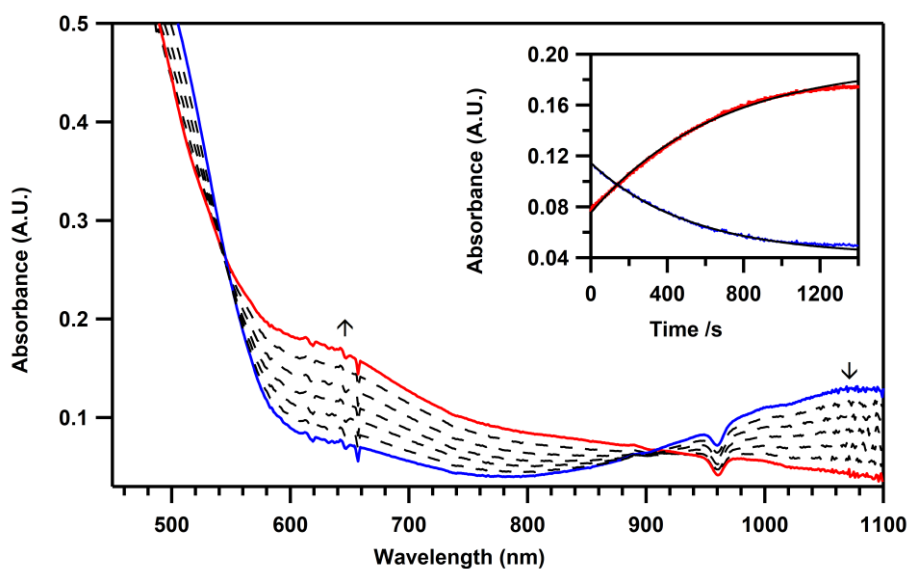

**Figure S2.** Electronic absorption spectra showing the reaction of 1.0 mM  $[\text{Mn}^{\text{IV}}(\text{O})(2\text{pyN}2\text{Q})]^{2+}$  (**2**) with 200  $\mu\text{L}$  MeCN ( $\sim 1740$  equiv.) in TFE at 25  $^\circ\text{C}$ . Inset: decay of the feature at 1020 nm ( $k_{\text{obs}} = 1.9(3) \times 10^{-3} \text{ s}^{-1}$ ) and the growth of the feature at 620 nm ( $k_{\text{obs}} = 1.5(2) \times 10^{-3} \text{ s}^{-1}$ ).

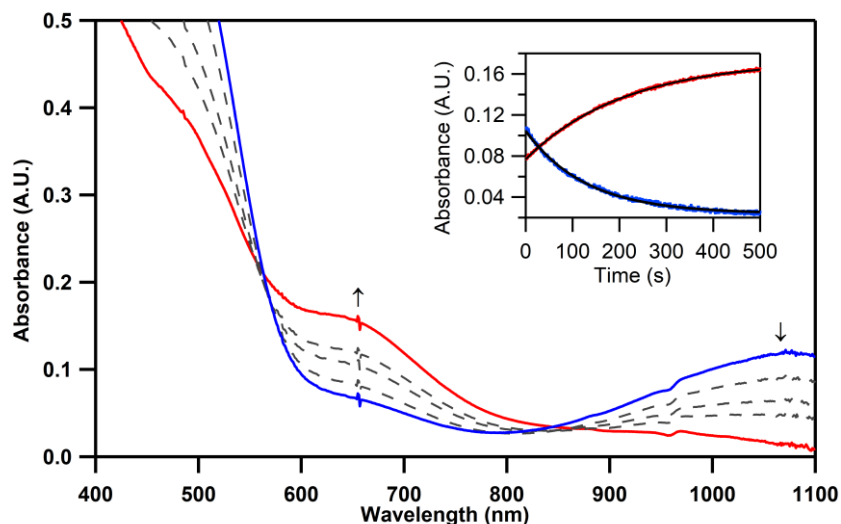

**Figure S3.** Electronic absorption spectra of reaction of 1.0 mM  $[\text{Mn}^{\text{IV}}(\text{O})(\text{N}2\text{py}2\text{Q})]^{2+}$  (**2**) with 40 equiv. cyclohexene- $\text{d}_{10}$  in TFE. Inset: decay of the feature at 1020 nm ( $k_{\text{obs}} = 7.8(6) \times 10^{-3} \text{ s}^{-1}$ ) and the growth of the feature at 620 nm ( $k_{\text{obs}} = 4.7(2) \times 10^{-3} \text{ s}^{-1}$ ).

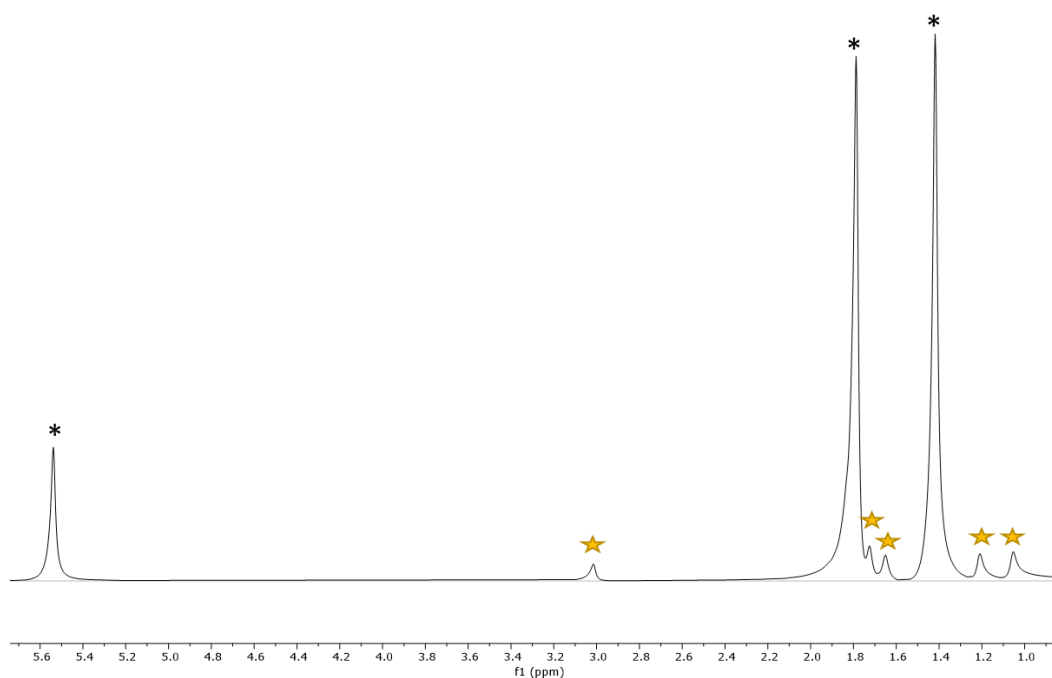

**Figure S4.**  $^2\text{H}$  NMR spectrum of the product of the reaction of cyclohexene- $\text{d}_{10}$  with  $[\text{Mn}^{\text{IV}}(\text{O})(\text{N}2\text{py}2\text{Q})]^{2+}$  (**2**) in  $\text{CF}_3\text{CH}_2\text{OH}/\text{CH}_3\text{CN}$  ( $v/v = 19:1$ ) at 298 K. The signals have been referenced to  $\text{CDCl}_3$ . The asterisk indicates excess cyclohexene- $\text{d}_{10}$  and the stars indicate cyclohexene oxide- $\text{d}_{10}$ .

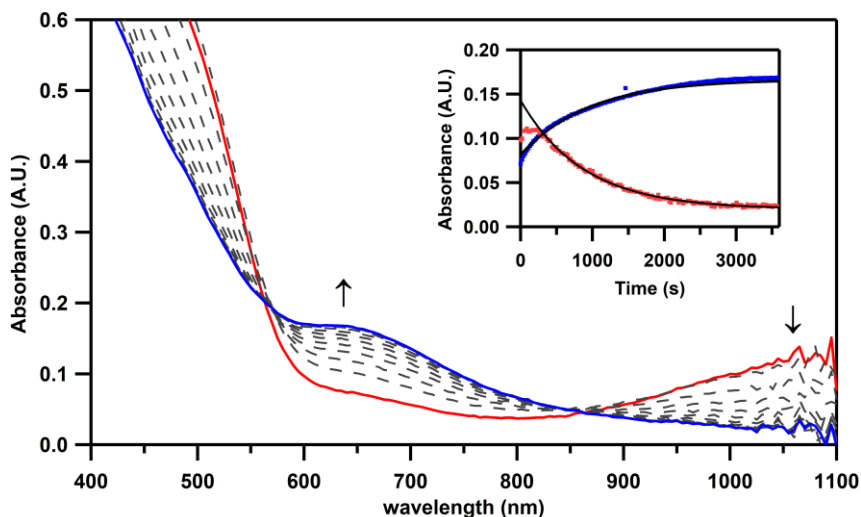

**Figure S5.** Electronic absorption spectra of the reaction of 1.0 mM  $[\text{Mn}^{\text{IV}}(\text{O})(\text{N}2\text{py}2\text{Q})]^{2+}$  (**2**) and 1.0 mM  $[\text{Mn}^{\text{II}}(\text{N}2\text{py}2\text{Q})]^{2+}$  in TFE at 298 K. Inset: decay of the feature at 1020 nm ( $k_{\text{obs}} = 1.1(2) \times 10^{-3} \text{ s}^{-1}$ ) and the growth of the feature at 620 nm ( $k_{\text{obs}} = 1.1(3) \times 10^{-3} \text{ s}^{-1}$ ).

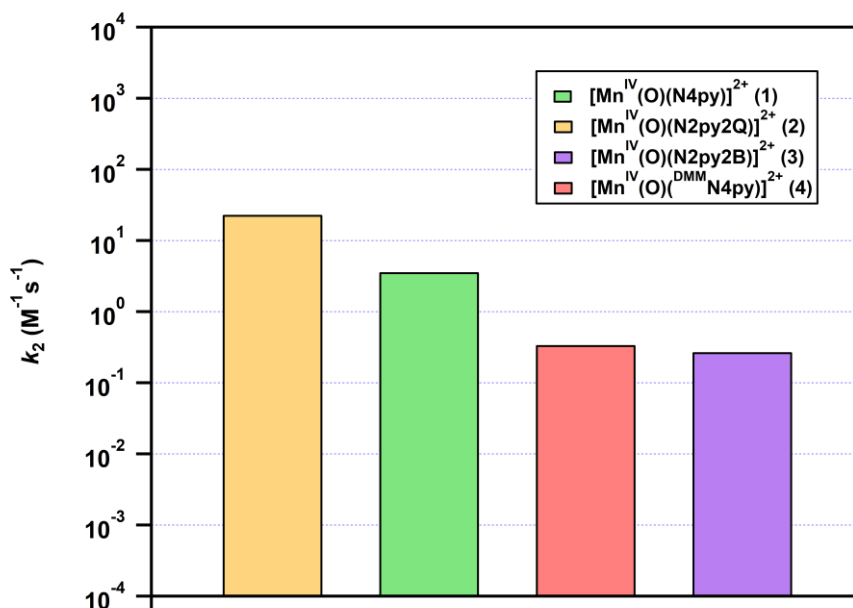

**Figure S6.** Comparison of second-order rate constants obtained for the reactions of 9,10-dihydroanthracene (DHA) and  $\text{Mn}^{\text{IV}}$  – oxo adducts in TFE at 298 K.

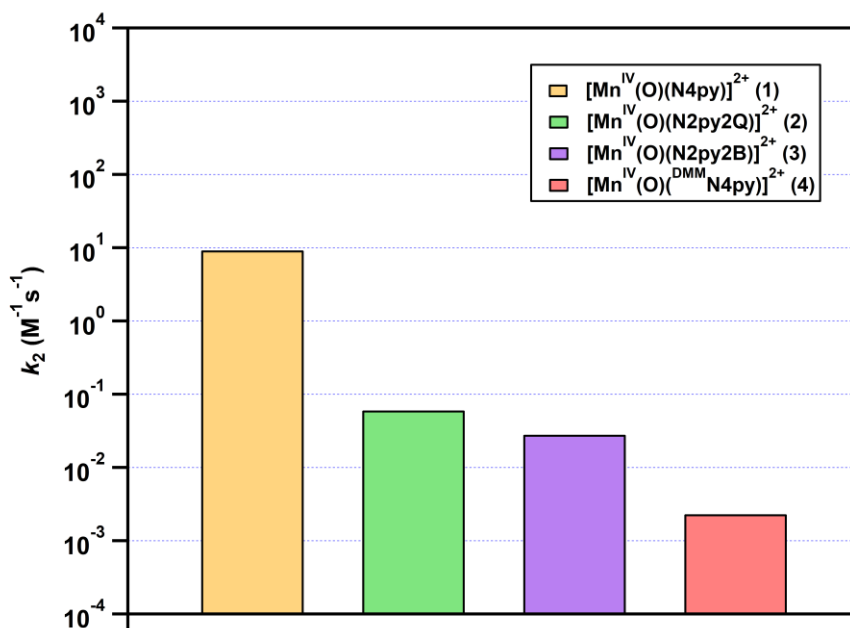

**Figure S7.** Comparison of second-order rate constants obtained for the reactions of thioanisole and Mn<sup>IV</sup> – oxo adducts in TFE at 298 K.

## Computational details

The Bordwell equation (main article, equation 3) used to calculate Mn<sup>III</sup>O–H BDFE for **1-4** consist of the term C<sub>G</sub> (free energy constant). This term represents the solvent dependence of the BDFE values as both the reduction potential and pK<sub>a</sub> terms in the Bordwell equation are highly influenced by the identity of the solvent. Ideally, we would include a C<sub>G</sub> value for TFE, which is the solvent used for all the experimental data. However, we are unaware of a C<sub>G</sub> value for this solvent. Consequently, while we employed the C<sub>G</sub> value for acetonitrile (52.6)<sup>1</sup> to determine absolute BDFEs, we will discuss ΔBDFEs relative to **1**.

The E<sub>1/2</sub> of Mn<sup>IV/III</sup> couples was calculated using equation 4 and 5, based on the isodesmic reaction model between Mn<sup>IV</sup>-oxo complexes and **1** (scheme S1a) where experimental Mn<sup>IV/III</sup> reduction potential of **1** was used as reference to account for systematic errors. Similarly, experimentally known pK<sub>a</sub> of [Mn<sup>IV</sup>(OH)<sub>2</sub>(Me<sub>2</sub>EBC)]<sup>2+</sup> was used as reference to calculate pK<sub>a</sub> values of **1-4** for the reaction shown in scheme S1b using the equation 4 and 6. These results have been summarized in Table S1.

$$E_{rxn} = products - reactants \quad \dots \text{Equation 4}$$

$$E_{1/2,calc}(V) = \frac{E_{rxn,2a}}{23.06 V} + E_{1/2,exp}(V) \quad \dots \text{Equation 5}$$

$$pK_{a,calc} = \frac{E_{rxn,2b} + pK_{a,exp}(kcal\ mol^{-1})}{1.37} \quad \dots \text{Equation 6}$$

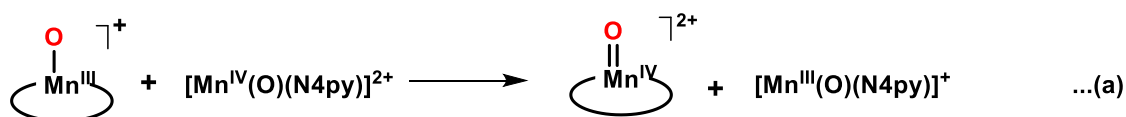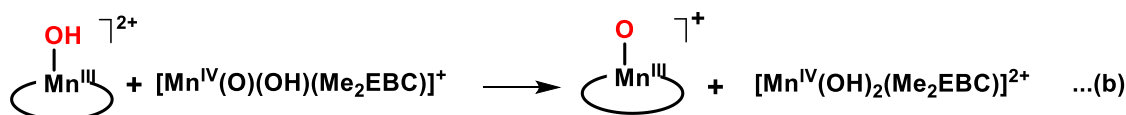

**Scheme S1.** a) Isodesmic reaction between Mn<sup>IV</sup>-oxo complexes (**1-4**) and **1** for determination of reduction potential of **1-4**; b) Model reaction for determination of pK<sub>a</sub> of **1-4** using [Mn<sup>IV</sup>(OH)<sub>2</sub>(Me<sub>2</sub>EBC)]<sup>2+</sup> reference.

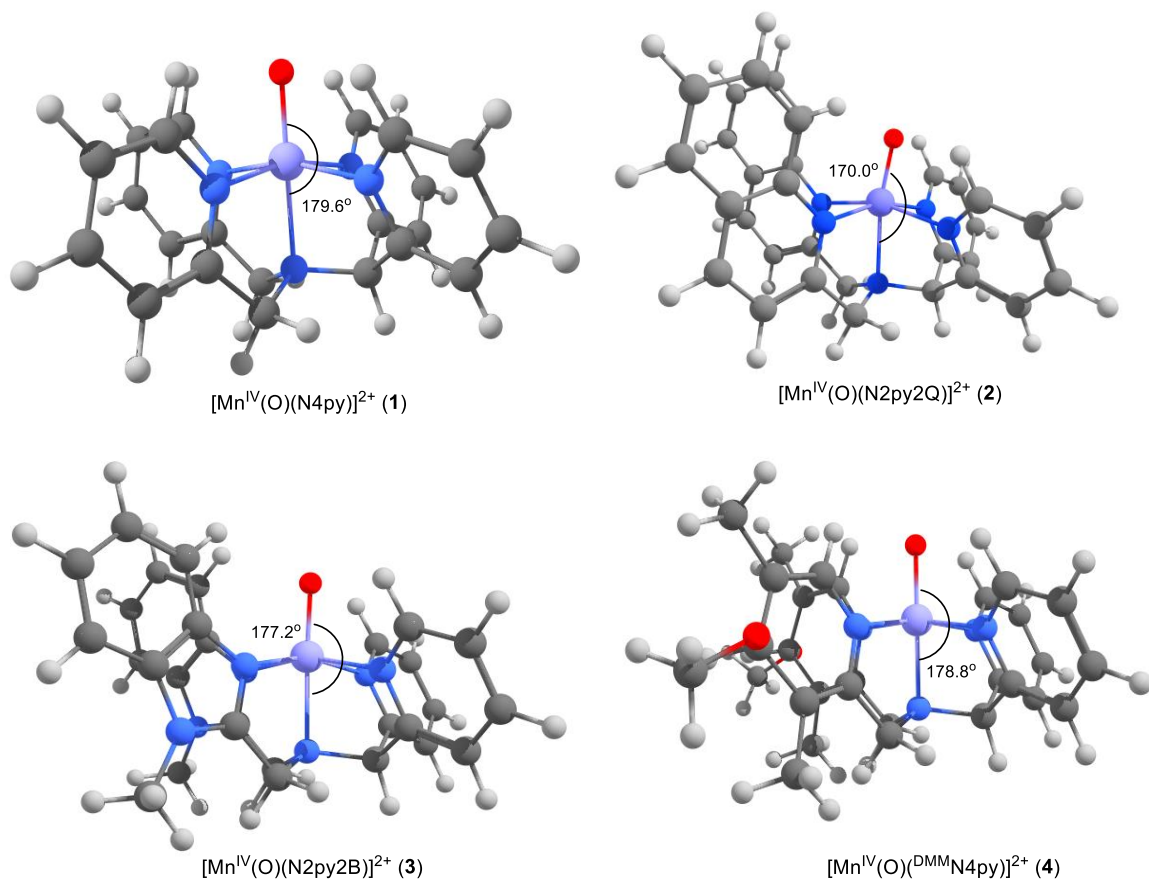

**Figure S8.** DFT computed structures of Mn<sup>IV</sup>-oxo complexes **1-4** with axial (N<sub>ax</sub>-Mn-O) angle distortion displayed.

**Table S1.** DFT calculated free energy of the reaction between Mn<sup>IV</sup>-oxo species and dimethyl sulfide (DMS).

| Complexes               | [Mn <sup>IV</sup> (O)(N4py)] <sup>2+</sup><br>(1) | [Mn <sup>IV</sup> (O)(N2py2Q)] <sup>2+</sup><br>(2) | [Mn <sup>IV</sup> (O)(N2py2B)] <sup>2+</sup><br>(3) | [Mn <sup>IV</sup> (O)( <sup>DMM</sup> N4py)] <sup>2+</sup><br>(4) |
|-------------------------|---------------------------------------------------|-----------------------------------------------------|-----------------------------------------------------|-------------------------------------------------------------------|
| $\Delta G_{\text{DFT}}$ | -19.34                                            | -22.96                                              | -18.86                                              | -14.93                                                            |

**Table S2.** DFT calculated values of pK<sub>a</sub>, E<sub>1/2</sub> and Mn<sup>III</sup>O–H BDFEs.

| Complexes                                                    | pK <sub>a</sub> | E <sub>P,C</sub> | $\Delta$ BDFE | BDFE   |
|--------------------------------------------------------------|-----------------|------------------|---------------|--------|
| [Mn <sup>III</sup> (OH)(N4py)] <sup>2+</sup>                 | 18.35           | 0.80             | 0.00          | 98.49  |
| [Mn <sup>III</sup> (OH)(N2py2Q)] <sup>2+</sup>               | 17.42           | 1.05             | 4.42          | 102.91 |
| [Mn <sup>III</sup> (OH)( <sup>DMM</sup> N4py)] <sup>2+</sup> | 18.73           | 0.71             | -1.58         | 96.91  |
| [Mn <sup>III</sup> (OH)(N2py2B)] <sup>2+</sup>               | 20.54           | 0.55             | -2.73         | 95.75  |

**Table S3.** Summary of DFT calculated electronic energies, entropies and free energies of the species discussed in this work.

| Complexes                                                      | Electronic Energy kcal/mol | Zero Point Energy kcal/mol | $\Delta H^{\ddagger} =$ Electronic + ZPE | vib   | rot   | trans | G           |
|----------------------------------------------------------------|----------------------------|----------------------------|------------------------------------------|-------|-------|-------|-------------|
| [Mn <sup>IV</sup> (O)(N4py)] <sup>2+</sup> (1)                 | -1498773.64                | 256.58                     | -1498517.06                              | 21.53 | 10.56 | 13.16 | -1498562.31 |
| [Mn <sup>IV</sup> (O)(N2py2Q)] <sup>2+</sup> (2)               | -1691572.90                | 315.54                     | -1691257.36                              | 27.34 | 10.96 | 13.34 | -1691309.00 |
| [Mn <sup>IV</sup> (O)(N2py2B)] <sup>2+</sup> (3)               | -1713226.36                | 328.09                     | -1712898.27                              | 30.55 | 11.00 | 13.35 | -1712953.17 |
| [Mn <sup>IV</sup> (O)( <sup>DMM</sup> N4py)] <sup>2+</sup> (4) | -1741171.40                | 365.81                     | -1740805.59                              | 36.11 | 11.10 | 13.36 | -1740866.16 |
| [Mn <sup>III</sup> (OH)(N4py)] <sup>2+</sup>                   | -1499327.12                | 261.81                     | -1499065.31                              | 23.85 | 10.6  | 13.16 | -1499112.92 |
| [Mn <sup>III</sup> (OH)(N2py2Q)] <sup>2+</sup>                 | -1692124.74                | 321.01                     | -1691803.73                              | 29.46 | 10.99 | 13.34 | -1691857.52 |
| [Mn <sup>III</sup> (OH)(N2py2B)] <sup>2+</sup>                 | -1713777.93                | 333.31                     | -1713444.62                              | 32.89 | 11.04 | 13.35 | -1713501.90 |
| [Mn <sup>III</sup> (OH)( <sup>DMM</sup> N4py)] <sup>2+</sup>   | -1741714.81                | 369.97                     | -1741344.84                              | 39.85 | 11.13 | 13.37 | -1741409.19 |
| [Mn <sup>II</sup> (TFE)(N4py)] <sup>2+</sup>                   | -1735747.62                | 289.68                     | -1735457.94                              | 31.50 | 10.92 | 13.31 | -1735513.67 |
| [Mn <sup>II</sup> (TFE)(N2py2Q)] <sup>2+</sup>                 | -1928550.81                | 348.48                     | -1928202.33                              | 36.95 | 11.22 | 13.47 | -1928263.97 |
| [Mn <sup>II</sup> (TFE)(N2py2B)] <sup>2+</sup>                 | -1950199.97                | 360.74                     | -1949839.23                              | 40.08 | 11.26 | 13.48 | -1949904.05 |
| [Mn <sup>II</sup> (TFE)( <sup>DMM</sup> N4py)] <sup>2+</sup>   | -1978140.37                | 398.67                     | -1977741.70                              | 46.55 | 11.36 | 13.49 | -1977813.10 |
| TFE                                                            | -284134.17                 | 35.83                      | -284098.34                               | 3.08  | 7.89  | 11.84 | -284121.15  |
| DMSO                                                           | -347117.04                 | 49.53                      | -347067.51                               | 2.73  | 7.42  | 11.62 | -347089.28  |
| DMS                                                            | -299926.75                 | 47.17                      | -299879.58                               | 2.11  | 7.03  | 11.42 | -299900.14  |



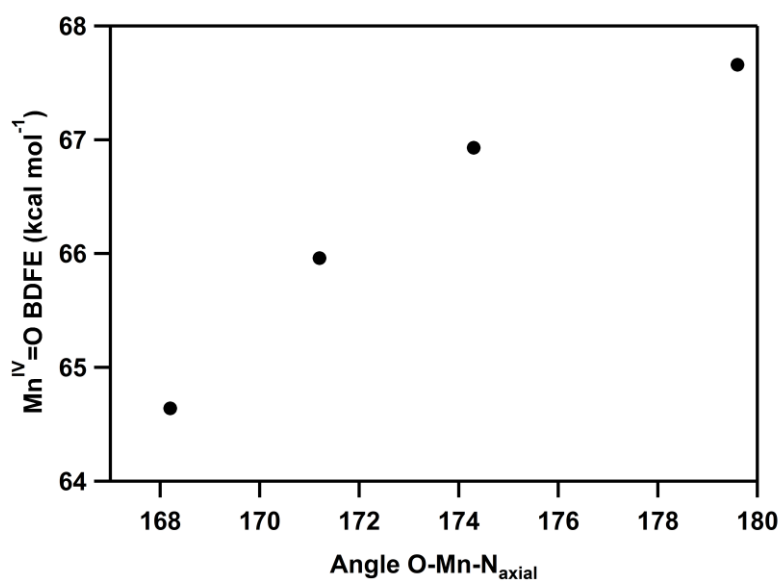

**Figure S9.** A correlation between Mn<sup>IV</sup>=O BDFE and distortion of the axial angle (O-Mn-N<sub>ax</sub>) from ideal value of 180°.

**Reference:**

1. S. V. Lymar, M. Z. Ertem and D. E. Polyansky, *Dalton Transactions*, 2018, **47**, 15917-15928.
